# Supplementary material
Source: PubMed Central journal article supplement (PMC6822213)
Supplement: DS_10.1177_1941738119873892_Appendix_1.pdf [file DS_10.1177_1941738119873892_Appendix_1.pdf]

### Appendix 1: Search Strategy

| Database            | Search Strategy                                                                                                                                                                                                                                                               | Results |
|---------------------|-------------------------------------------------------------------------------------------------------------------------------------------------------------------------------------------------------------------------------------------------------------------------------|---------|
| Embase              | (‘labrum’ OR ‘labral tear’ OR ‘SLAP’ OR ‘arthroscop*’)<br><br>AND (‘return to sport’/exp OR ‘return to work’/exp OR<br><br>‘return to play’ OR ‘athlete’) not animals/ not (animals/ and<br><br>humans/) limit to english language                                            | 1612    |
| Medline             | (‘labrum’ OR ‘labral tear’ OR ‘SLAP’ OR ‘arthroscop*’)<br><br>AND (‘return to sport’/exp OR ‘return to work’/exp OR<br><br>‘return to play’ OR ‘athlete’) not animals/ not (animals/ and<br><br>humans/) limit to english language                                            | 611     |
| PubMed              | (“labrum”[mesh] OR “labral tear”[tiab] OR “slap”[tiab] OR<br><br>“arthroscop*”[tiab]) AND (“return to play”[tiab] OR “return<br><br>to activity”[mesh] OR “return to sport”[mesh] OR<br><br>“athlete”[tiab]) NOT animals/NOT (animals/and humans/)                            | 834     |
| Cochrane<br>Library | (“labrum” OR “labral tear” OR (“arthroscopic” OR<br><br>“arthroscopic SLAP repair” OR “arthroscopic surgery”))<br><br>[ti,ab,kw] AND (“return to sport” OR “return to play” OR<br><br>“return to work” OR “athlete”) [ti,ab,kw] “not (animals [mh ]<br><br>not humans [mh ])” | 57      |
