# Supplementary material
Source: PubMed Central journal article supplement (PMC6822213)
Supplement: DS_10.1177_1941738119873892_Appendix_2.pdf [file DS_10.1177_1941738119873892_Appendix_2.pdf]

Appendix 2. Surgical Technique and Characteristics of SLAP Repair & Concomitant Procedures

| Study                                | Portal Configuration                                         | Knotted vs. Knotless | Concomitant Procedure(s)                                                                                                                                               |
|--------------------------------------|--------------------------------------------------------------|----------------------|------------------------------------------------------------------------------------------------------------------------------------------------------------------------|
| Boesmueller et al. 2017 <sup>2</sup> | Neviaser                                                     | Knotted              | --                                                                                                                                                                     |
| Boileau et al. 2009 <sup>3</sup>     | Posterior, Anterior working & Neviaser                       | Knotted              | --                                                                                                                                                                     |
| Brockmeier et al. 2009 <sup>4</sup>  | Neviaser                                                     | Knotted              | --                                                                                                                                                                     |
| Chalmers et al. 2015 <sup>8</sup>    | Anterior                                                     | Both                 | --                                                                                                                                                                     |
| Cohen et al. 2006 <sup>9</sup>       | Anterior, superolateral rotator interval, trans-rotator cuff | --                   | --                                                                                                                                                                     |
| Denard et al. 2014 <sup>10</sup>     | Anterosuperolateral, Port of Wilmington                      | Knotted              | Subacromial decompression, distal clavicle excision, posterior capsular release, spinoglenoid cyst debridement                                                         |
| Fedoriw et al. 2014 <sup>11</sup>    | --                                                           | --                   | Rotator cuff repair                                                                                                                                                    |
| Friel et al. 2010 <sup>12</sup>      | Anterior                                                     | Knotted              | Bankart repair, subacromial decompression, distal clavicle excision, labral cyst decompression, microfracture of the humeral head, capsular release, and acromioplasty |
| Gilliam et al. 2017 <sup>13</sup>    | --                                                           | Knotted              | --                                                                                                                                                                     |
| Ide et al. 2005 <sup>16</sup>        | Posterior, Anterosuperior, Lateral                           | Knotted              | --                                                                                                                                                                     |
| Kim et al. 2012 <sup>17</sup>        | Posterior, Anteroinferior, Anterosuperior                    | Knotted              | --                                                                                                                                                                     |
| Kim et al. 2002 <sup>18</sup>        | Posterior, Anteroinferior, Anterosuperior                    | Knotted              | --                                                                                                                                                                     |
| Maier et al. 2013 <sup>20</sup>      | Anterosuperior, Anterior working                             | Knotted              | --                                                                                                                                                                     |
| Neri et al. 2011 <sup>23</sup>       | Posterior, Anterosuperior, Anteroinferior                    | Knotted              | Debridement                                                                                                                                                            |

---

|                                       |                                                       |          |                                                                                                                                                                                                                               |
|---------------------------------------|-------------------------------------------------------|----------|-------------------------------------------------------------------------------------------------------------------------------------------------------------------------------------------------------------------------------|
| Neuman et al.<br>2011 <sup>24</sup>   | Transmuscular<br>Rotator cuff                         | Knotted  | --                                                                                                                                                                                                                            |
| Park et al.<br>2013 <sup>25</sup>     | Posterior,<br>Anterosuperior,<br>Anteroinferior       | Knotted  | --                                                                                                                                                                                                                            |
| Provencher et<br>al. <sup>27</sup>    | Posterior, midglenoid, lateral                        | Knotted  | Debridement                                                                                                                                                                                                                   |
| Rhee et al.<br>2005 <sup>28</sup>     | Lateral-edge                                          | --       | --                                                                                                                                                                                                                            |
| Samani et al.<br>2001 <sup>29</sup>   | Anterior, posterior,<br>anterosuperior                | Knotted  | Debridement, limited subacromial<br>decompression consisting of<br>complete bursectomy, recession of<br>the coracoacromial ligament, and<br>resection of the undersurface of<br>the anterior acromion, rotator cuff<br>repair |
| Smith et al.<br>2016 <sup>33</sup>    | --                                                    | --       | --                                                                                                                                                                                                                            |
| Waterman et al.<br>2015 <sup>37</sup> | --                                                    | --       | --                                                                                                                                                                                                                            |
| Yung et al.<br>2008 <sup>38</sup>     | Anterosuperior,<br>mid-glenoid,<br>trans-rotator cuff | Knotless | --                                                                                                                                                                                                                            |

---
